# Supplementary material
Source: MDPI journal article supplement (https://www.mdpi.com/2077-0472/14/5/766)
Supplement: s1 [file s1]

**Supplementary Table S1.** Results of principal component analysis (PCA) of 11 soil properties and their norm values for constructing evaluation indicators for the minimum data set (MSD)

| Property               | PC1    | PC2    | PC3    | Norm value |
|------------------------|--------|--------|--------|------------|
| SBD                    | 0.912  | -0.094 | 0.346  | 2.735      |
| SOM                    | 0.987  | -0.059 | 0.086  | 2.96       |
| TN                     | 0.961  | 0.115  | -0.038 | 2.882      |
| TP                     | 0.931  | -0.27  | 0.167  | 2.792      |
| TK                     | 0.508  | 0.662  | 0.541  | 1.523      |
| AN                     | 0.92   | 0.254  | -0.219 | 2.759      |
| AP                     | 0.978  | -0.011 | 0.058  | 2.933      |
| AK                     | 0.951  | -0.179 | 0.01   | 2.852      |
| ExCa                   | 0.991  | -0.077 | -0.02  | 2.972      |
| ExMg                   | 0.811  | -0.425 | 0.372  | 2.663      |
| ExMn                   | 0.888  | 0.164  | -0.347 | 2.432      |
| Eigenvalues            | 8.991  | 0.848  | 0.76   |            |
| Percent (%)            | 81.737 | 7.707  | 6.91   |            |
| Cumulative percent (%) | 81.737 | 89.444 | 96.354 |            |
